# Supplementary material for: TP53Mutations and Survival in Squamous-Cell Carcinoma of the Head and Neck
Source: Atypon-hosted journal article supplement (doi:10.1056/nejmoa073770), 2007-12-19

## Supplementary Appendix

This appendix has been provided by the authors to give readers additional information about their work.

Supplement to: Poeta ML, Manola J, Goldwasser MA, et al. *TP53* mutations and survival in squamous-cell carcinoma of the head and neck. *N Engl J Med* 2007;357:2552-61.

Supplement:

Procedure used for classification of TP53 mutations

**DISRUPTIVE MUTATIONS:**

1) All DNA sequence alterations that introduce a STOP sequence resulting in disruption of

p53 protein production or

2) Any DNA sequence alteration which:

a) occurs within the L2, or L3 binding domains (codons 163-195 or 236-251)

AND

b) replaces an amino acid from one polarity/charge category (see table) with an amino acid from another category.

Table: Classification of Amino Acids by Polarity and Charge

| Non Polar, | Polar, Negatively charged, (Acidic) | Polar, No charge, | Polar, Positively Charged |
|------------|-------------------------------------|-------------------|---------------------------|
| Phe        | Asp                                 | Cys               | His                       |
| Met        | Glu                                 | Asn               | Lys                       |
| Trp        |                                     | Gln               | Arg                       |

|     |  |     |  |
|-----|--|-----|--|
| Ile |  | Thr |  |
| Val |  | Tyr |  |
| Leu |  | Ser |  |
| Ala |  | Gly |  |
| Pro |  |     |  |

NON-DISRUPTIVE MUTATIONS:

- 1) Any mutation occurring outside the L2 or L3 binding domain (except stop mutations)
- 2) Mutations within the L2 or L3 binding domains that result in replacement of an amino acid with another from the same polarity/charge category.

Supplementary Figure 1. Progression-free survival among patients with *disruptive* and *non-disruptive* mutations and among patients without *TP53* mutations. Median progression-free survival is 3.8, 2.1, and 1.1 years for patients with wild type, non-disruptive and disruptive mutations, respectively.

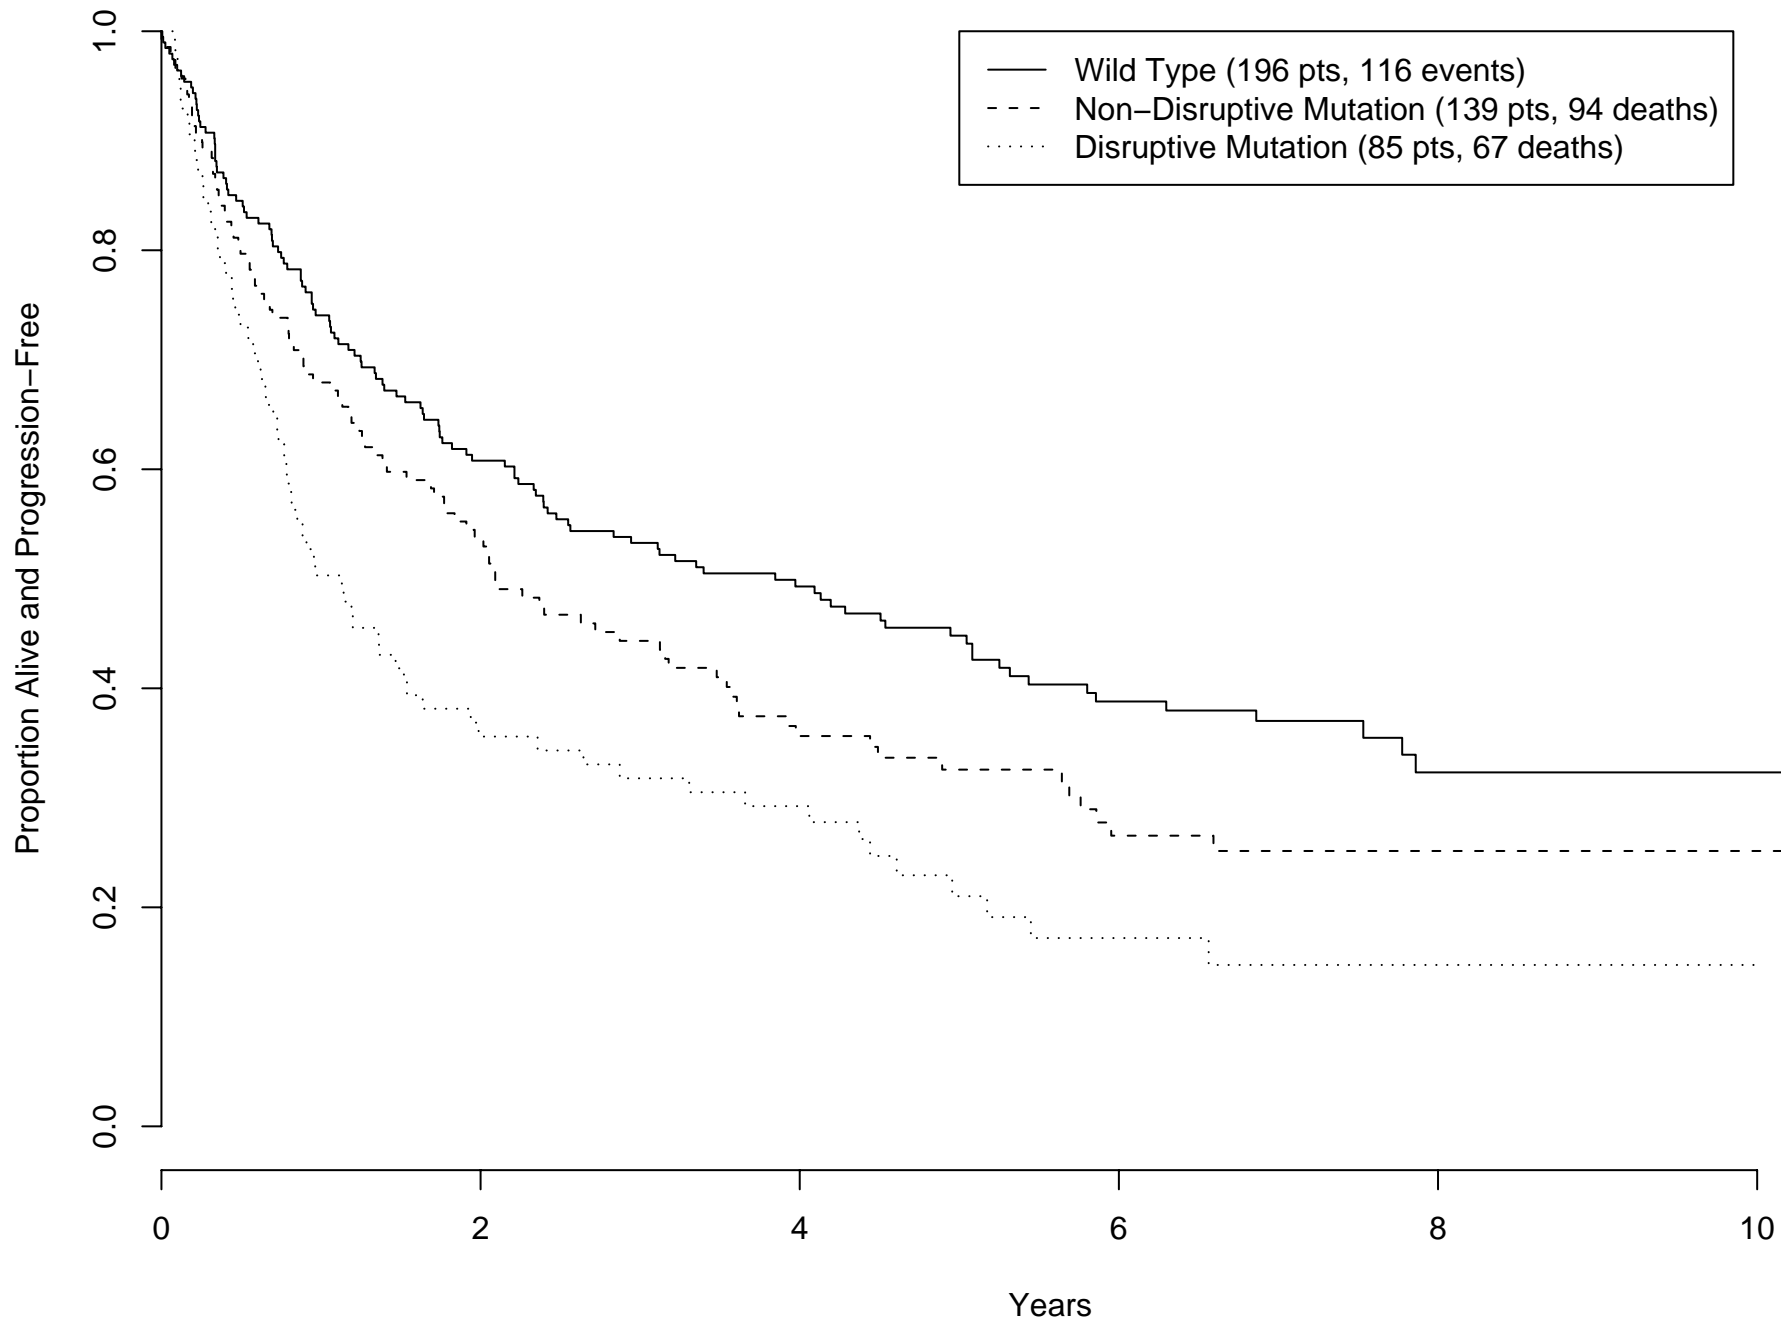

Supplement: nejm_poeta_2552sa1.pdf [file nejm_poeta_2552sa1.pdf]
